# Supplementary material for: Inactivation of the E3 Ubiquitin Ligase IDOL Attenuates Diet-Induced Obesity and Metabolic Dysfunction in Mice
Source: PubMed Central journal article supplement — Arterioscler Thromb Vasc Biol. 2018 Jun 14;38(8):1785–95. doi: 10.1161/ATVBAHA.118.311168 (PMC6092113; doi:10.1161/atvbaha.118.311168), 2018-06-14

**Inactivation of the E3 ubiquitin ligase IDOL protects mice from diet-induced obesity and metabolic dysfunction**

Nienke M. van Loon<sup>1</sup>, Roelof Ottenhoff<sup>1</sup>, Sander Kooijman<sup>2</sup>, Martina Moeton<sup>1</sup>, Saskia Scheij<sup>1</sup>, Reinout L.P. Roscam Abbing<sup>3</sup>, Marion J.J. Gijbels<sup>1,4</sup>, Johannes H.M. Levels<sup>5</sup>, Vincenzo Sorrentino<sup>6</sup>, Jimmy F.P. Berbée<sup>2</sup>, Patrick C.N. Rensen<sup>2</sup>, Noam Zelcer<sup>1,7</sup>

*Supplemental material*

## **Supplementary figure legends**

### **Supplementary figure I. Growth curves and plasma lipids after 21 weeks of WTD.**

Wildtype (N = 11) and Idol-KO (N = 9) male mice were fed a 60% fat 0.2% cholesterol diet for 21 weeks. (A) Body weight was measured weekly and differed significantly from 11 weeks of WTD. At the end of the experiment, mice were fasted for 4 hours and the plasma level of (B) triglycerides and (C) total cholesterol determined. Each bar or point represents the mean  $\pm$  SEM. \* $p < 0.01$

### **Supplementary figure II. Phenotype of chow-fed Idol-KO mice.**

Female Idol (wildtype, N = 6/ heterozygous, N = 5/ knockout, N = 5) and male Idol (wildtype, N = 6 / heterozygous, N = 6 / knockout, N = 6) were fed chow diet *ad libitum*. (A) Bodyweight was evaluated biweekly, and (B) Blood glucose levels were measured in the indicated mice after 4 hour fasting at the age of 28 week. \*  $p < 0.01$ . Each bar or point represents the mean  $\pm$  SEM.

### **Supplementary figure III. Oral glucose tolerance test in Idol-KO mice fed a WTD.**

Wildtype (N = 12) and Idol-KO (N = 9) male mice were fed a 60% fat 0.2% cholesterol diet for (A) 8 weeks or (B) 20 weeks. Following a 4 hour fast mice were loaded with 2.0 g glucose / kg body weight by oral gavage and blood glucose measured at the indicated time. Each point represents the mean  $\pm$  SEM.

### **Supplementary figure IV. AST and ALT levels in WTD-fed wildtype and Idol-KO mice.**

Wildtype (N = 12) and Idol-KO (N = 9) male mice were fed a 60% fat 0.2% diet for 21 weeks. Plasma was collected at sacrifice and AST and ALT levels measured. Each bar represents the mean  $\pm$  SEM

### **Supplementary figure V. Quantification of UCP1 and TH in BAT of WTD-fed mice.**

Wildtype (N = 11) and Idol-KO (N = 9) male mice were fed a WTD-diet for 21 weeks as described in [Figure 4](#). Uncoupling protein 1 (UCP1) and Tyrosine hydroxylase (TH) staining in BAT of these mice was quantified as detailed in the “materials and methods” section. \*\*  $p < 0.01$ , \*\*\*  $p < 0.001$ . Each bar represents the mean  $\pm$  SEM.

### **Supplementary figure VI. Intestinal fat uptake and VLDL-TG production is unaltered in Idol-KO mice.**

(A) Wildtype and IDOL-KO male mice (N = 6 / group ; 10-12 weeks old) were fasted for 4 hours, after which they received an oral gavage of 400  $\mu$ L olive oil. Subsequently, blood samples were drawn from the tail vein at the indicated times and TG levels determined. (B) Wildtype and IDOL-KO male mice (N = 3 / group ; 18 weeks old) were fasted for 4 hours, after which they received an intraperitoneal injection of 1gr/kg Poloxamer 470. Subsequently, blood samples were drawn from the tail vein at the indicated times and TG levels determined. *Inset*: area under the curve comparison of wildtype and Idol-KO mice. Each point represents the mean  $\pm$  SEM.

### **Supplementary figure VII. Expression of *Anptl4* in gWAT and iBAT.**

Expression of *Angptl4* and *Lpl* in wildtype (N = 12) and Idol-KO (N = 9) male mice in gonadal WAT (gWAT) and intrascapular BAT (iBAT). Each bar represents the mean  $\pm$  SEM.

**Supplementary figure VIII. Total organ clearance of triglycerides and cholesterol in Idol-KO mice.** Wildtype (N = 8) and Idol-KO (N = 11) male mice were fed a WTD for 5 weeks. Mice were fasted for 4 hours and injected with reconstituted lipoproteins that contain glycerol tri<sup>3</sup>H]oleate and [<sup>14</sup>C]cholesteryl oleate. Subsequently, mice were sacrificed, organs were weighed and radioactivity in the indicated tissues was determined. Each bar represents the mean percentage of injected radioactivity per indicated organ  $\pm$  SEM. \*p<0.01, \*\* p<0.001, \*\*\* p<0.0001 gWAT; gonadal white adipose tissue, vWAT; visceral white adipose tissue, lsWAT; lower subcutaneous white adipose tissue, usWAT; upper subcutaneous white adipose tissue, pVAT; perivascular adipose tissue, iBAT; interscapular brown adipose tissue, sBAT; subscapular brown adipose tissue.

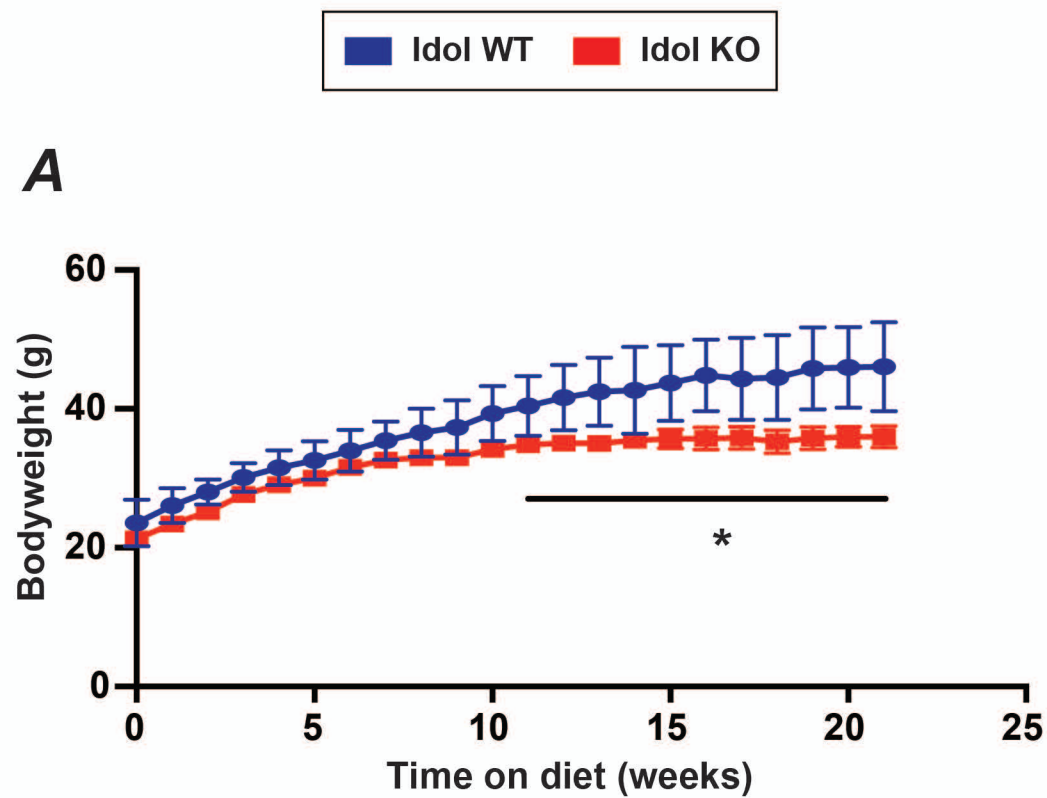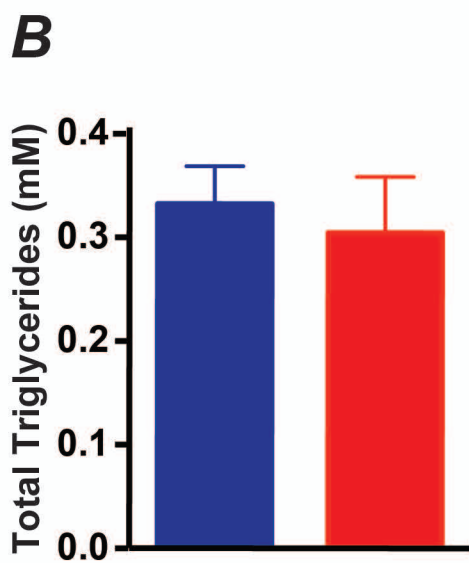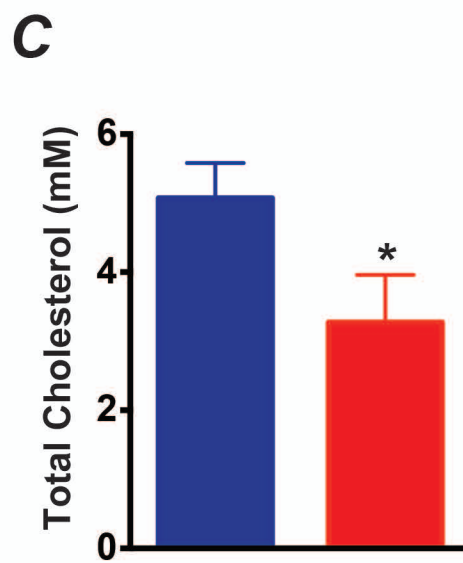

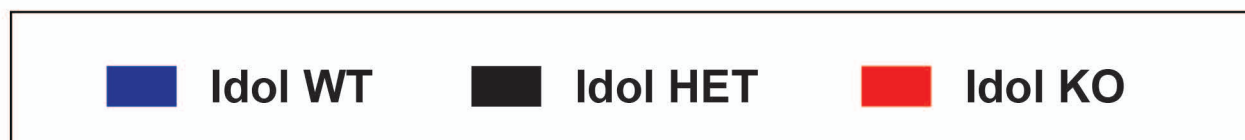**A**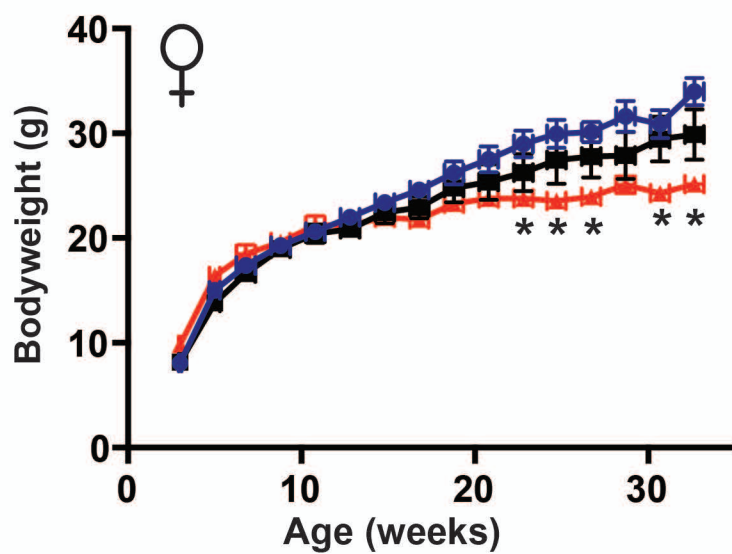**B**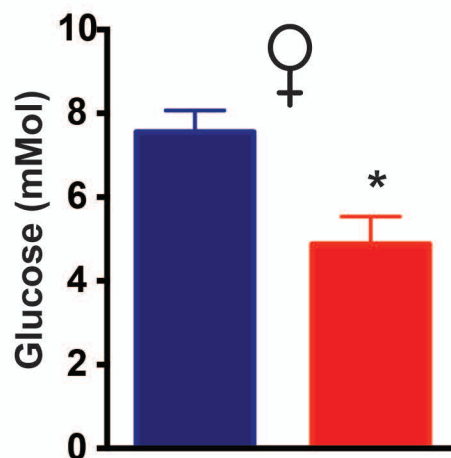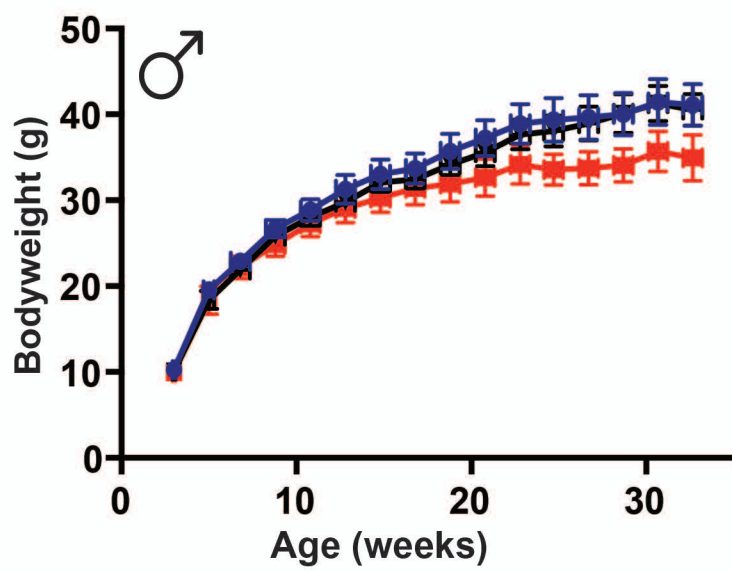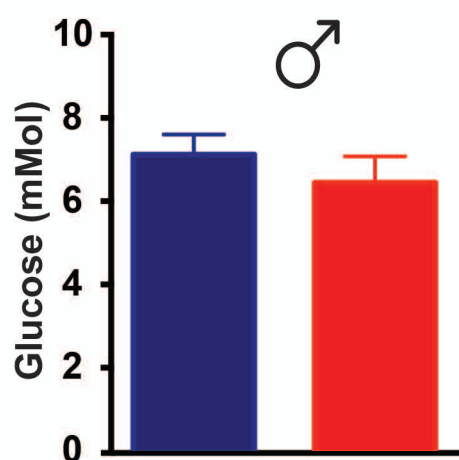

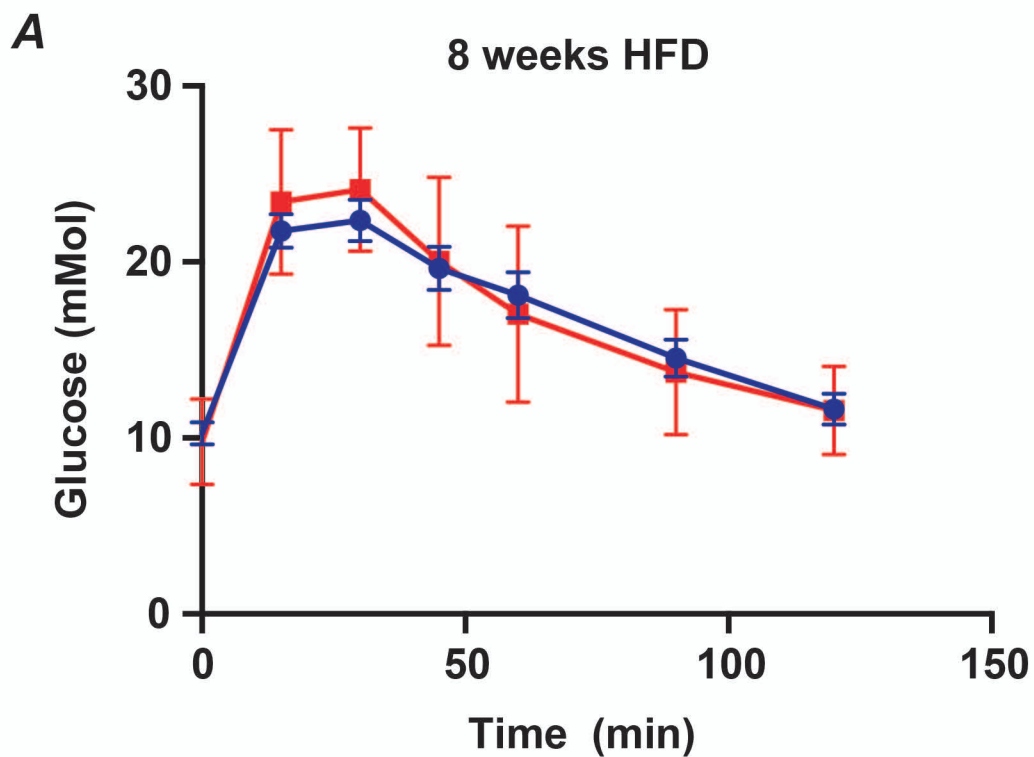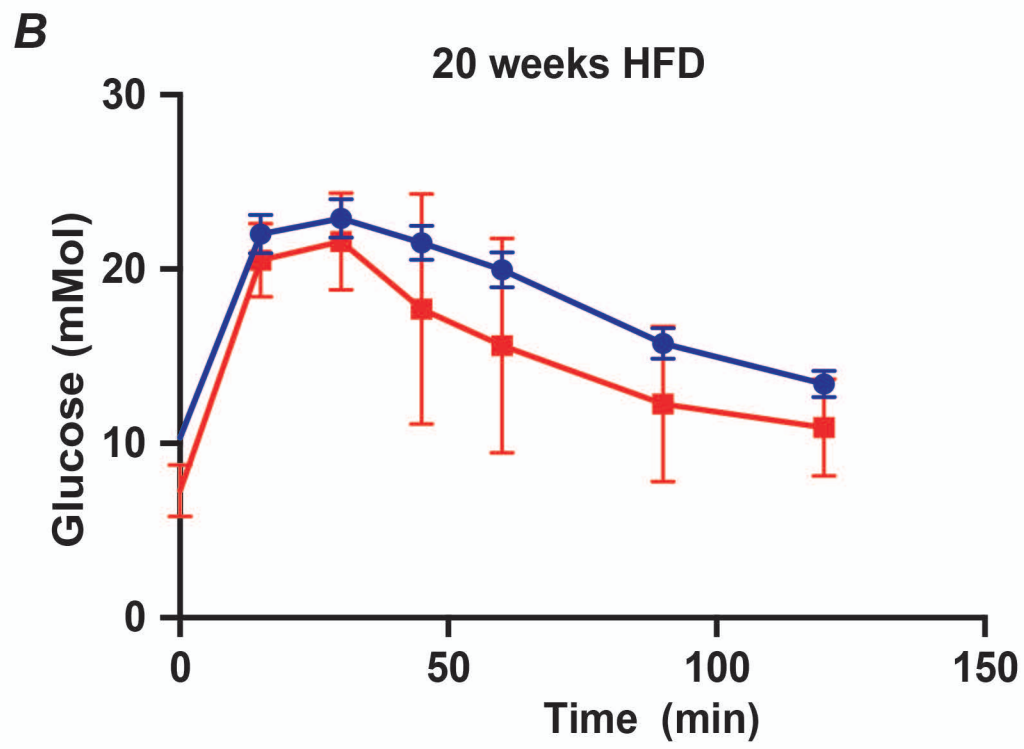

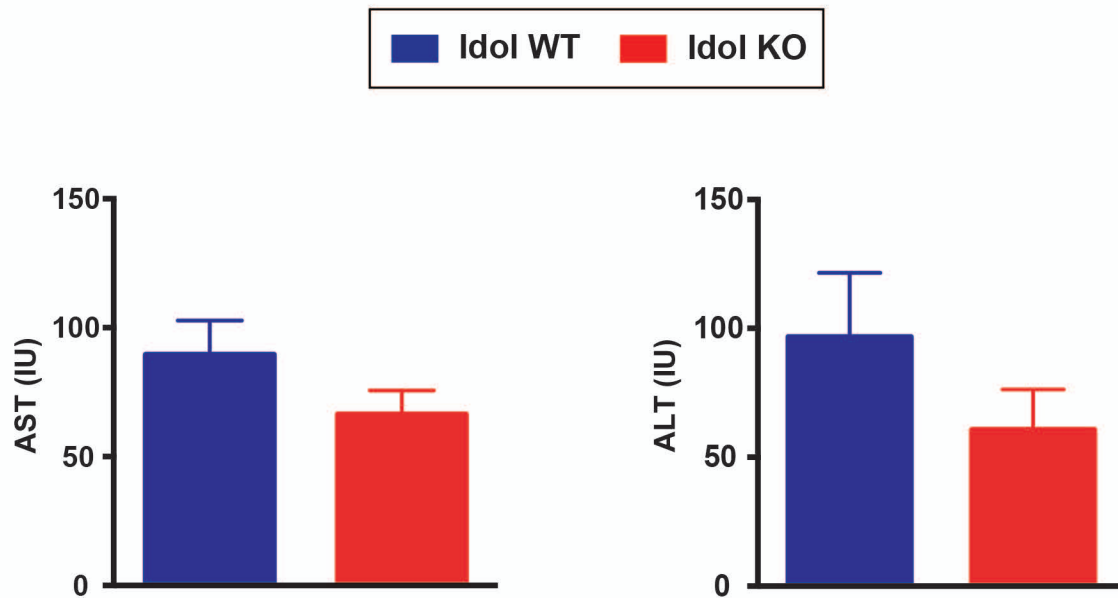

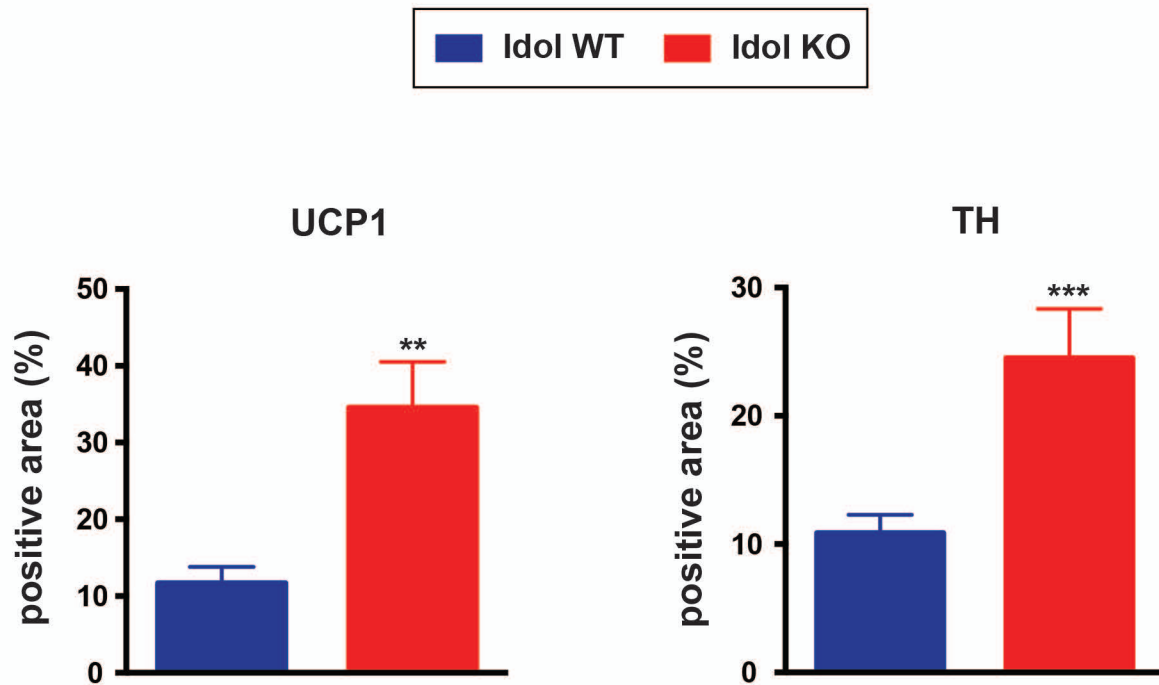



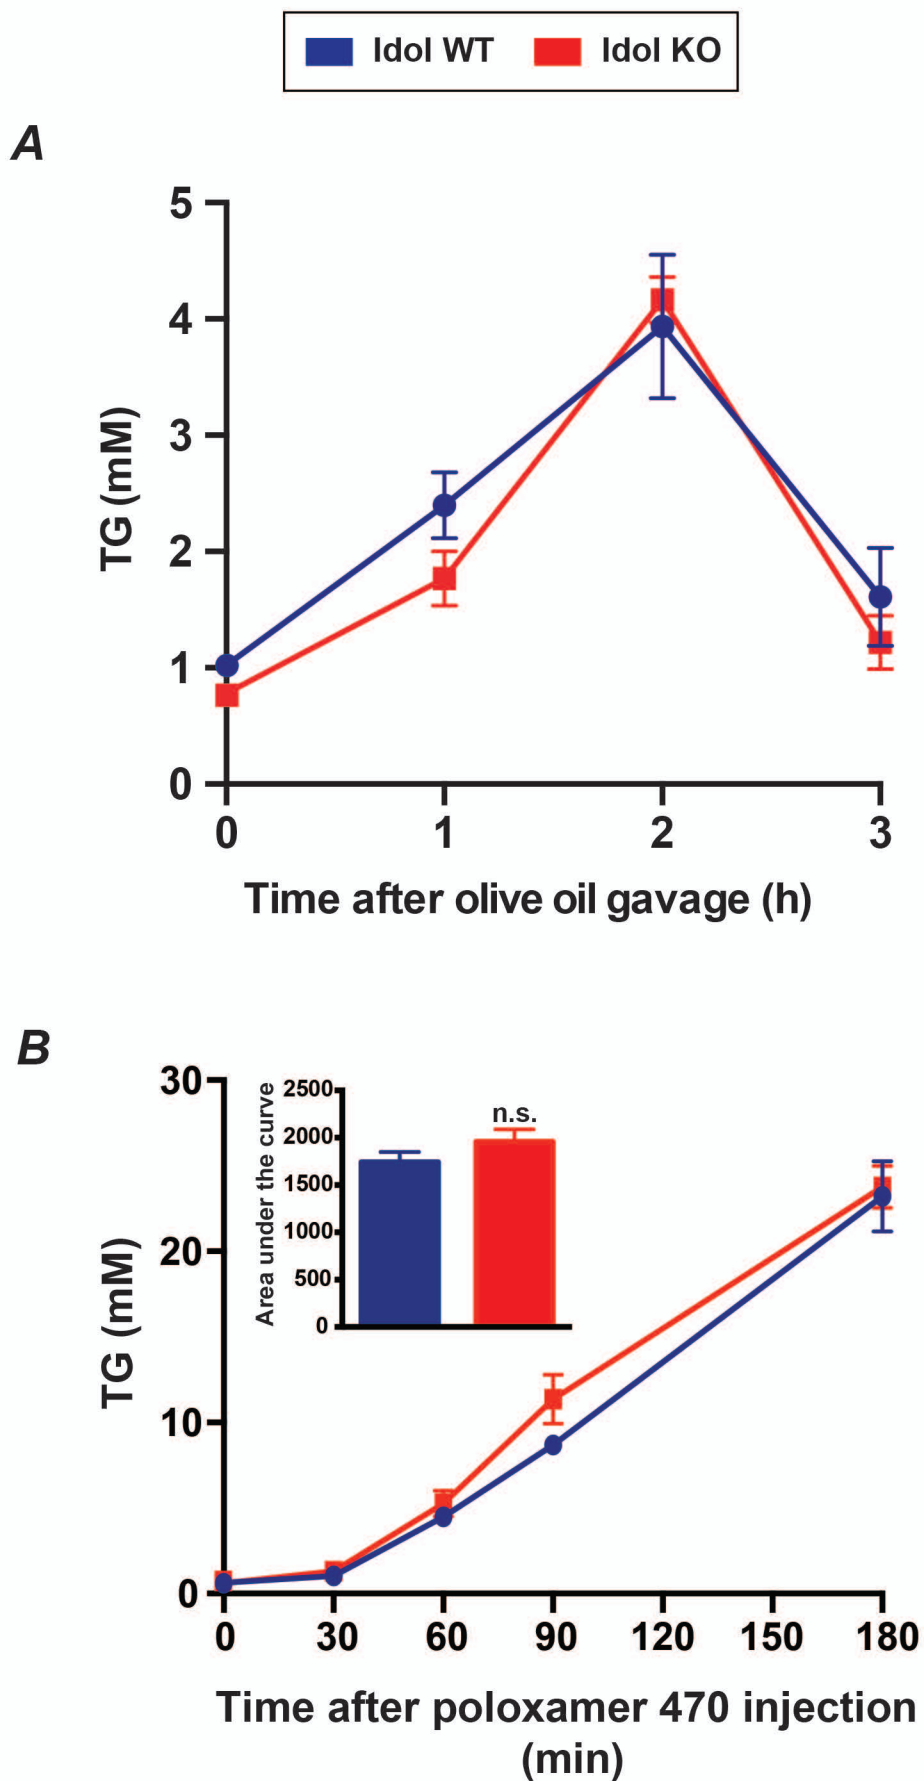

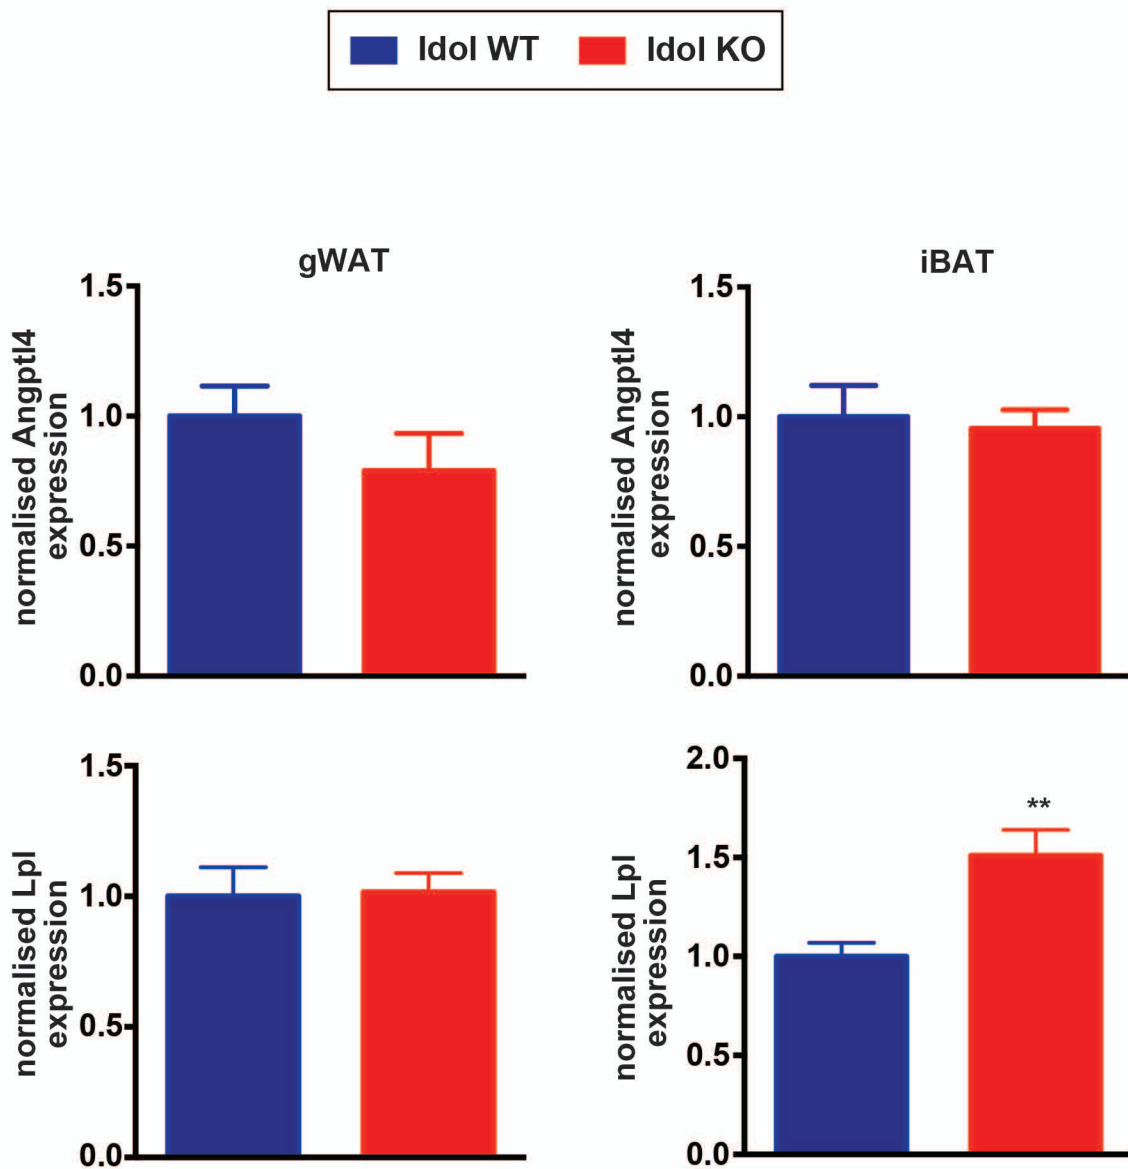

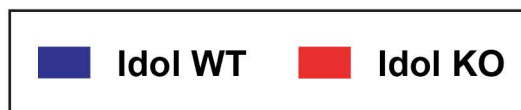**A**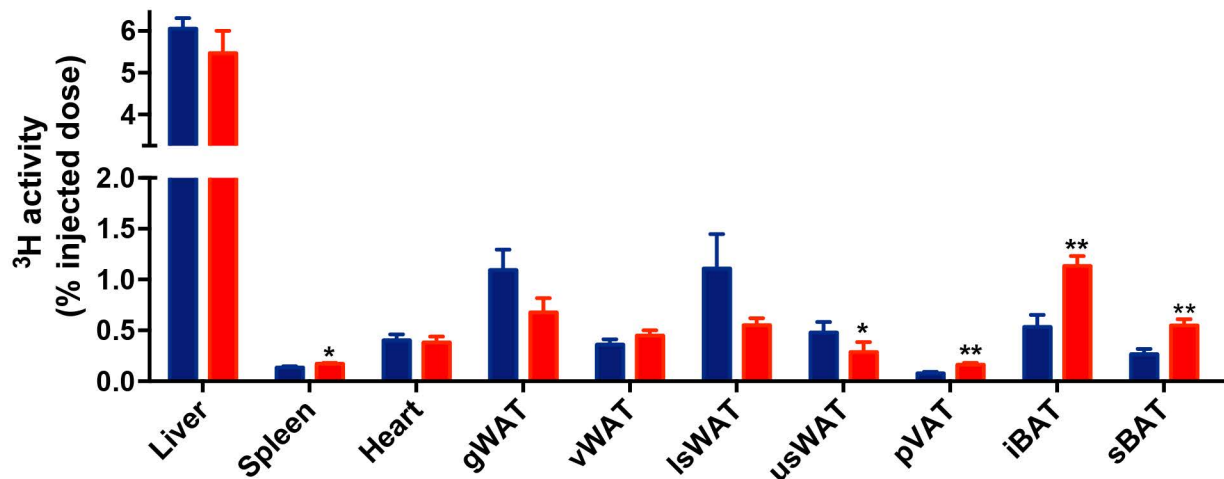**B**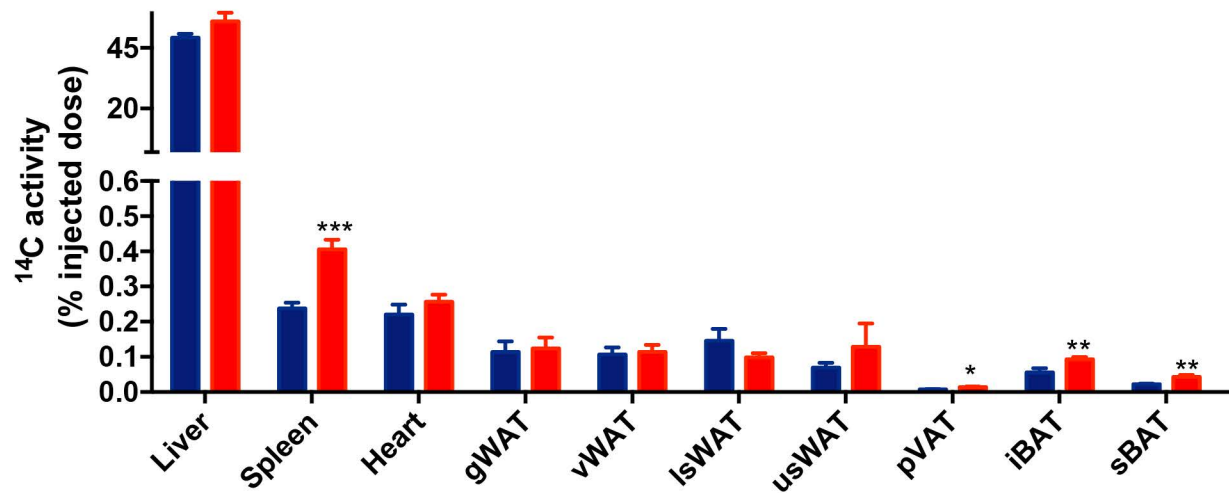

Supplement: atv-38-1785-s001.pdf [file atv-38-1785-s001.pdf]
