# Supplementary material for: Inactivation of the E3 Ubiquitin Ligase IDOL Attenuates Diet-Induced Obesity and Metabolic Dysfunction in Mice
Source: PubMed Central journal article supplement — Arterioscler Thromb Vasc Biol. 2018 Jun 14;38(8):1785–95. doi: 10.1161/ATVBAHA.118.311168 (PMC6092113; doi:10.1161/atvbaha.118.311168), 2018-06-14
Supplement: atv-38-1785-s002.pdf [file atv-38-1785-s002.pdf]

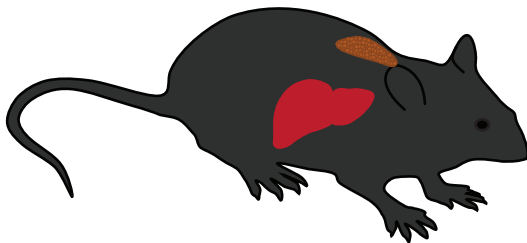

Western  
Diet

Wildtype

Idol<sup>(-/-)</sup>

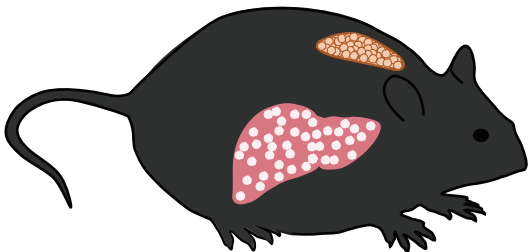

Body weight ↑  
Cholesterol ↑↑  
Glucose ↑↑  
Insulin ↑↑

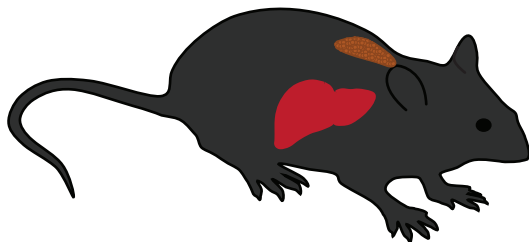

Body weight ↓  
Cholesterol ↓↓  
Glucose ↓↓  
Insulin ↓↓
